# Supplementary material
Source: PubMed Central journal article supplement (PMC3063894)

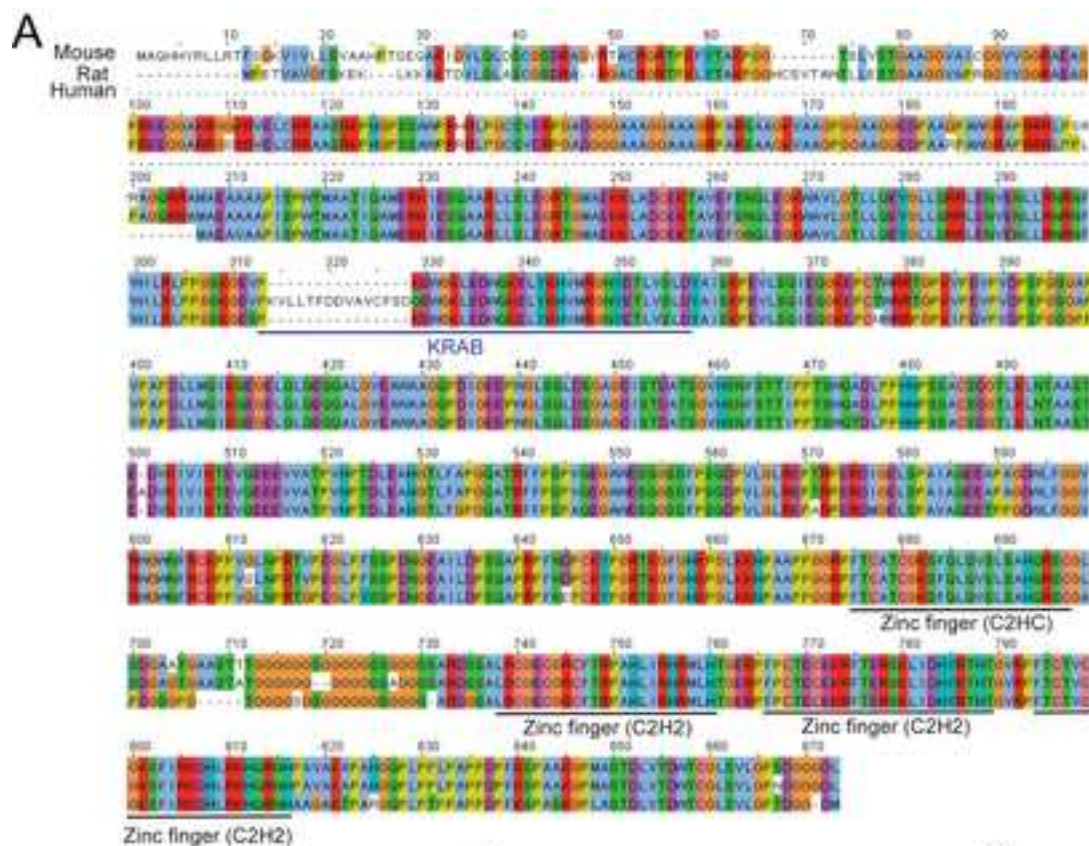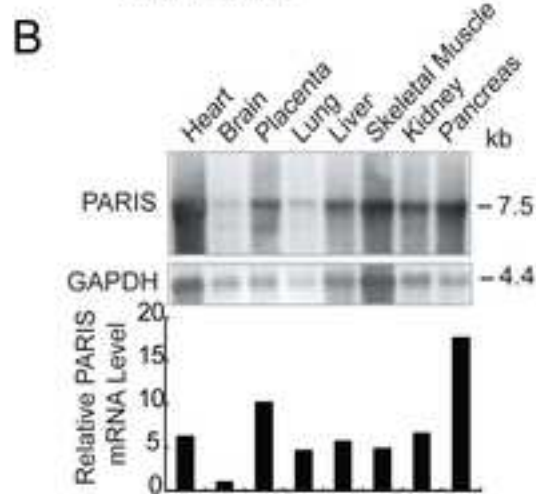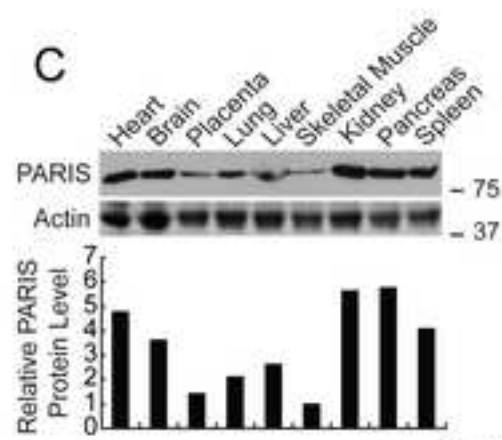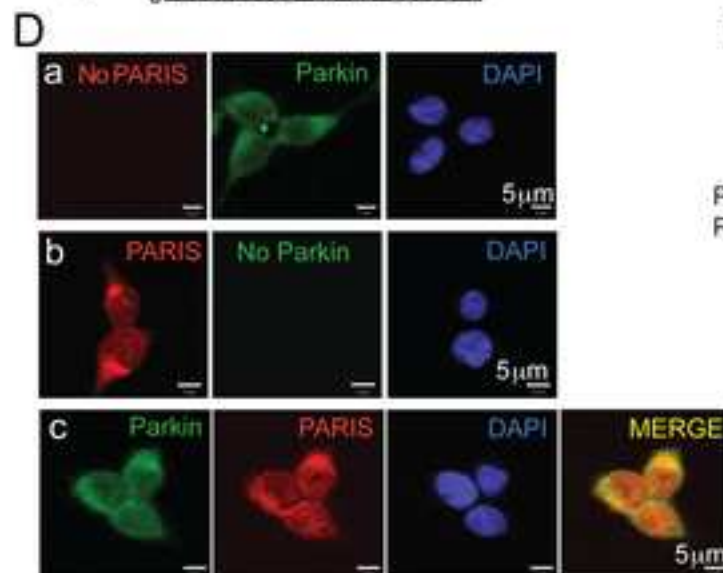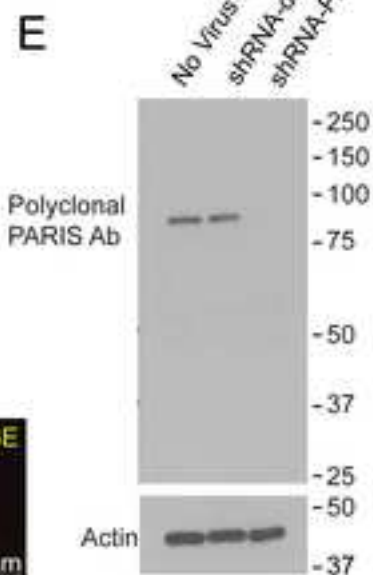

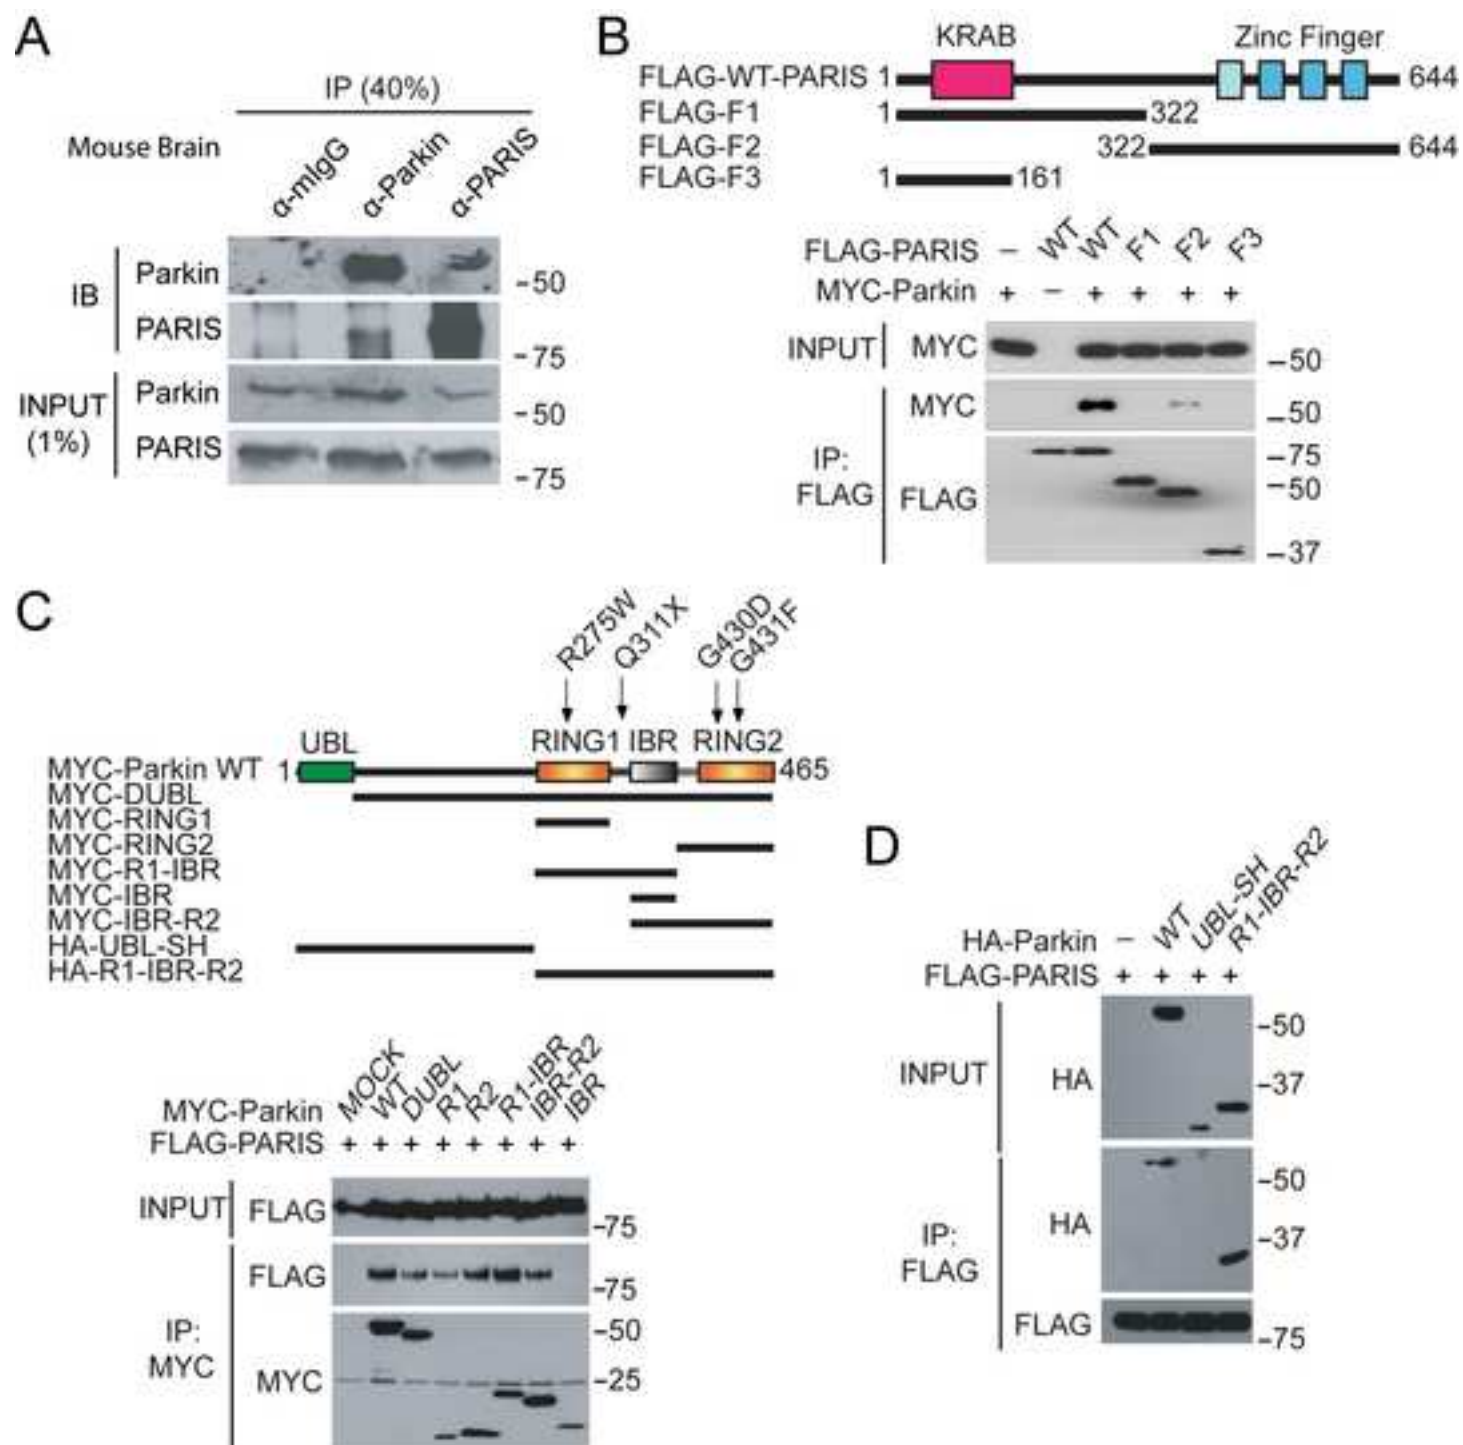

Supplemental Figure 3

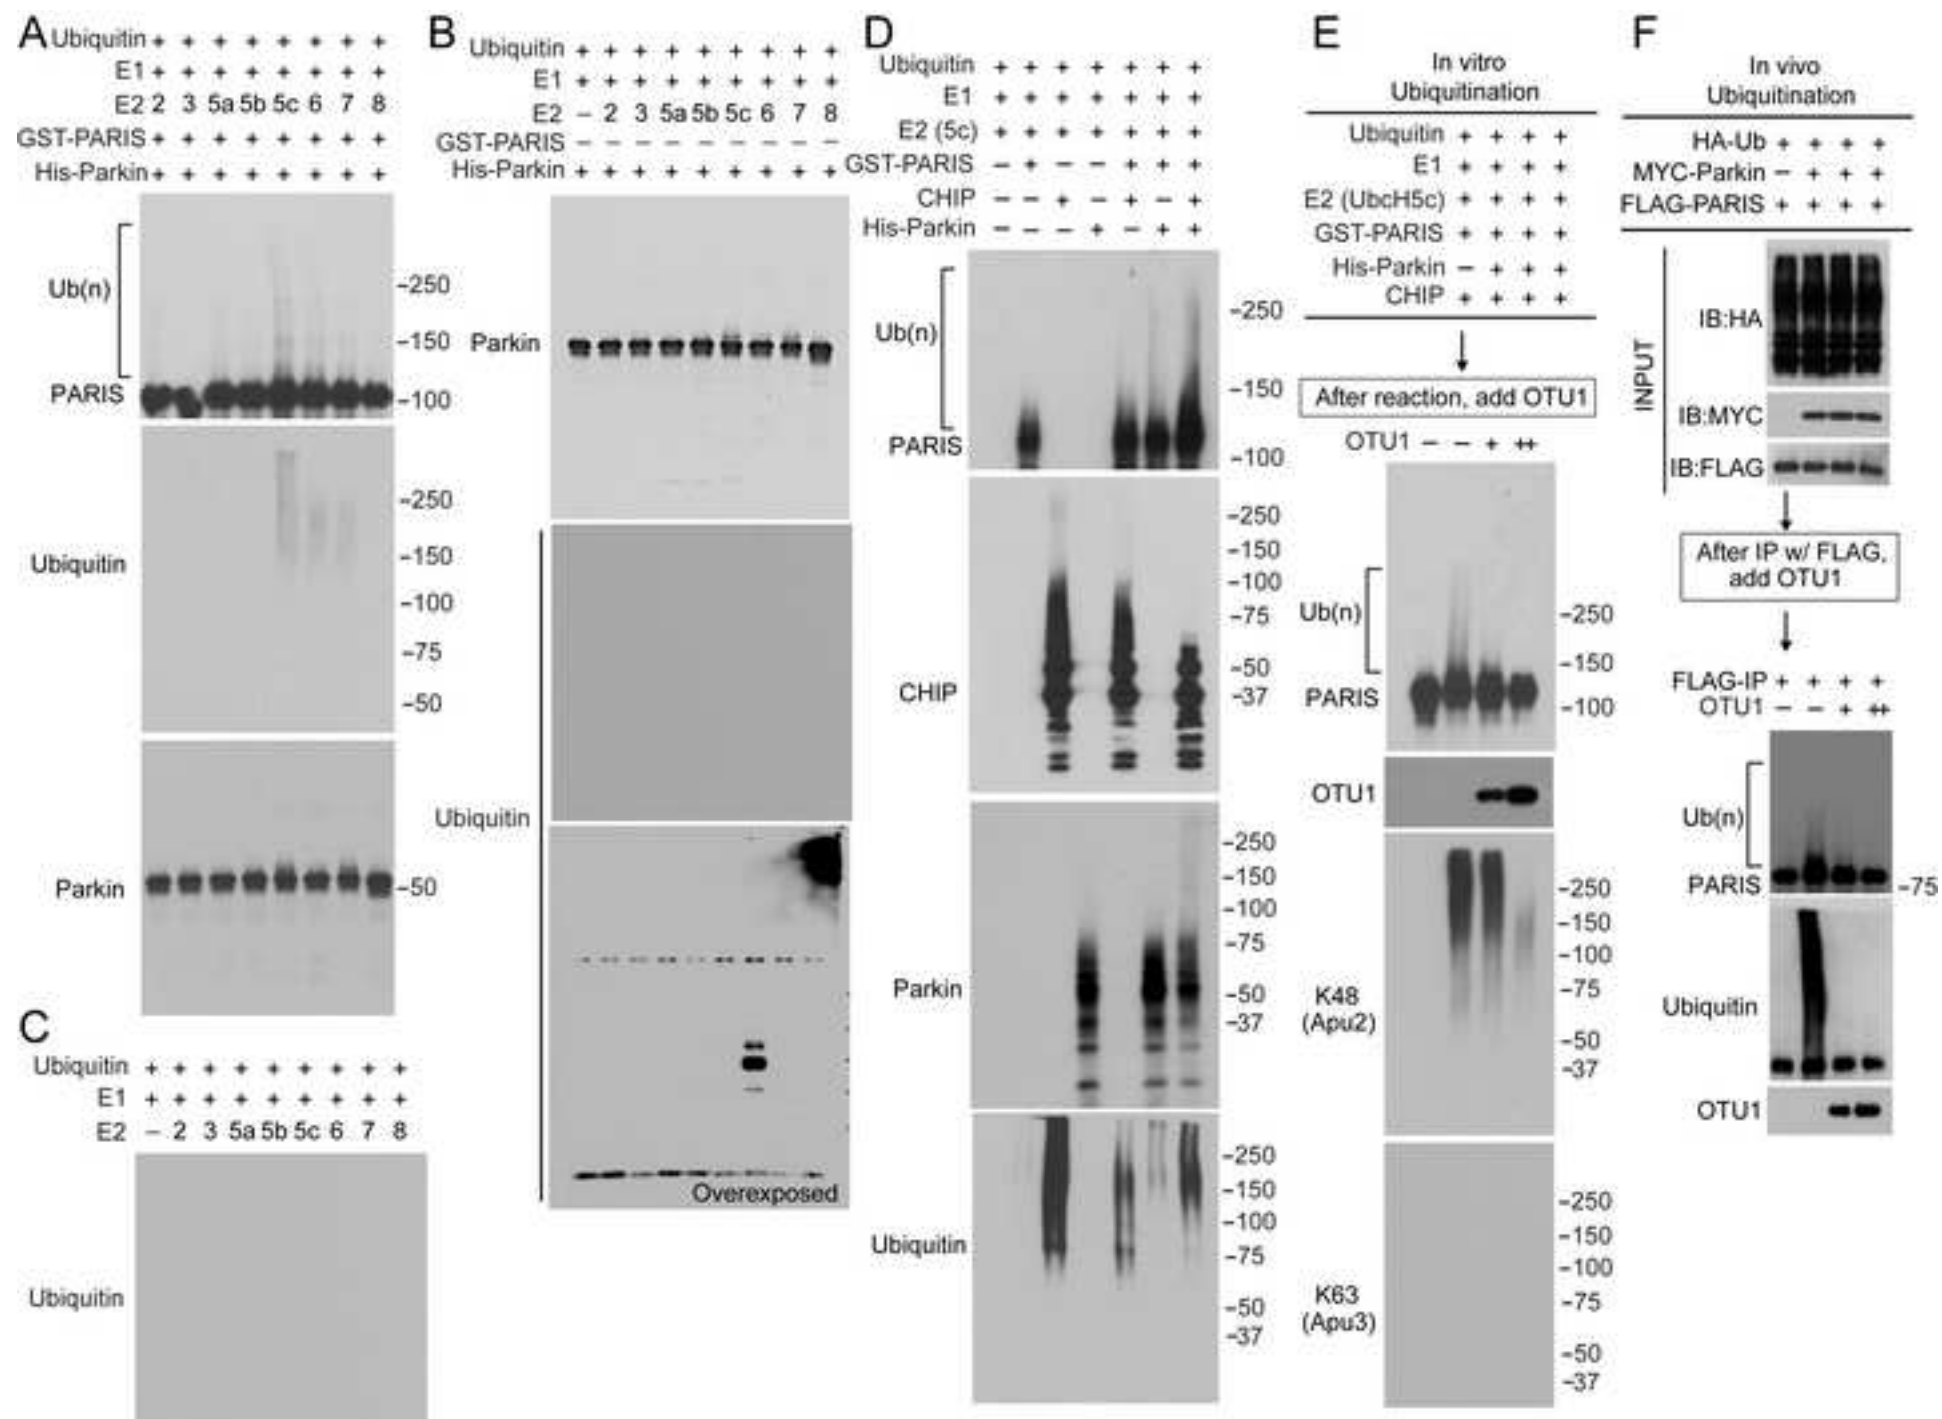

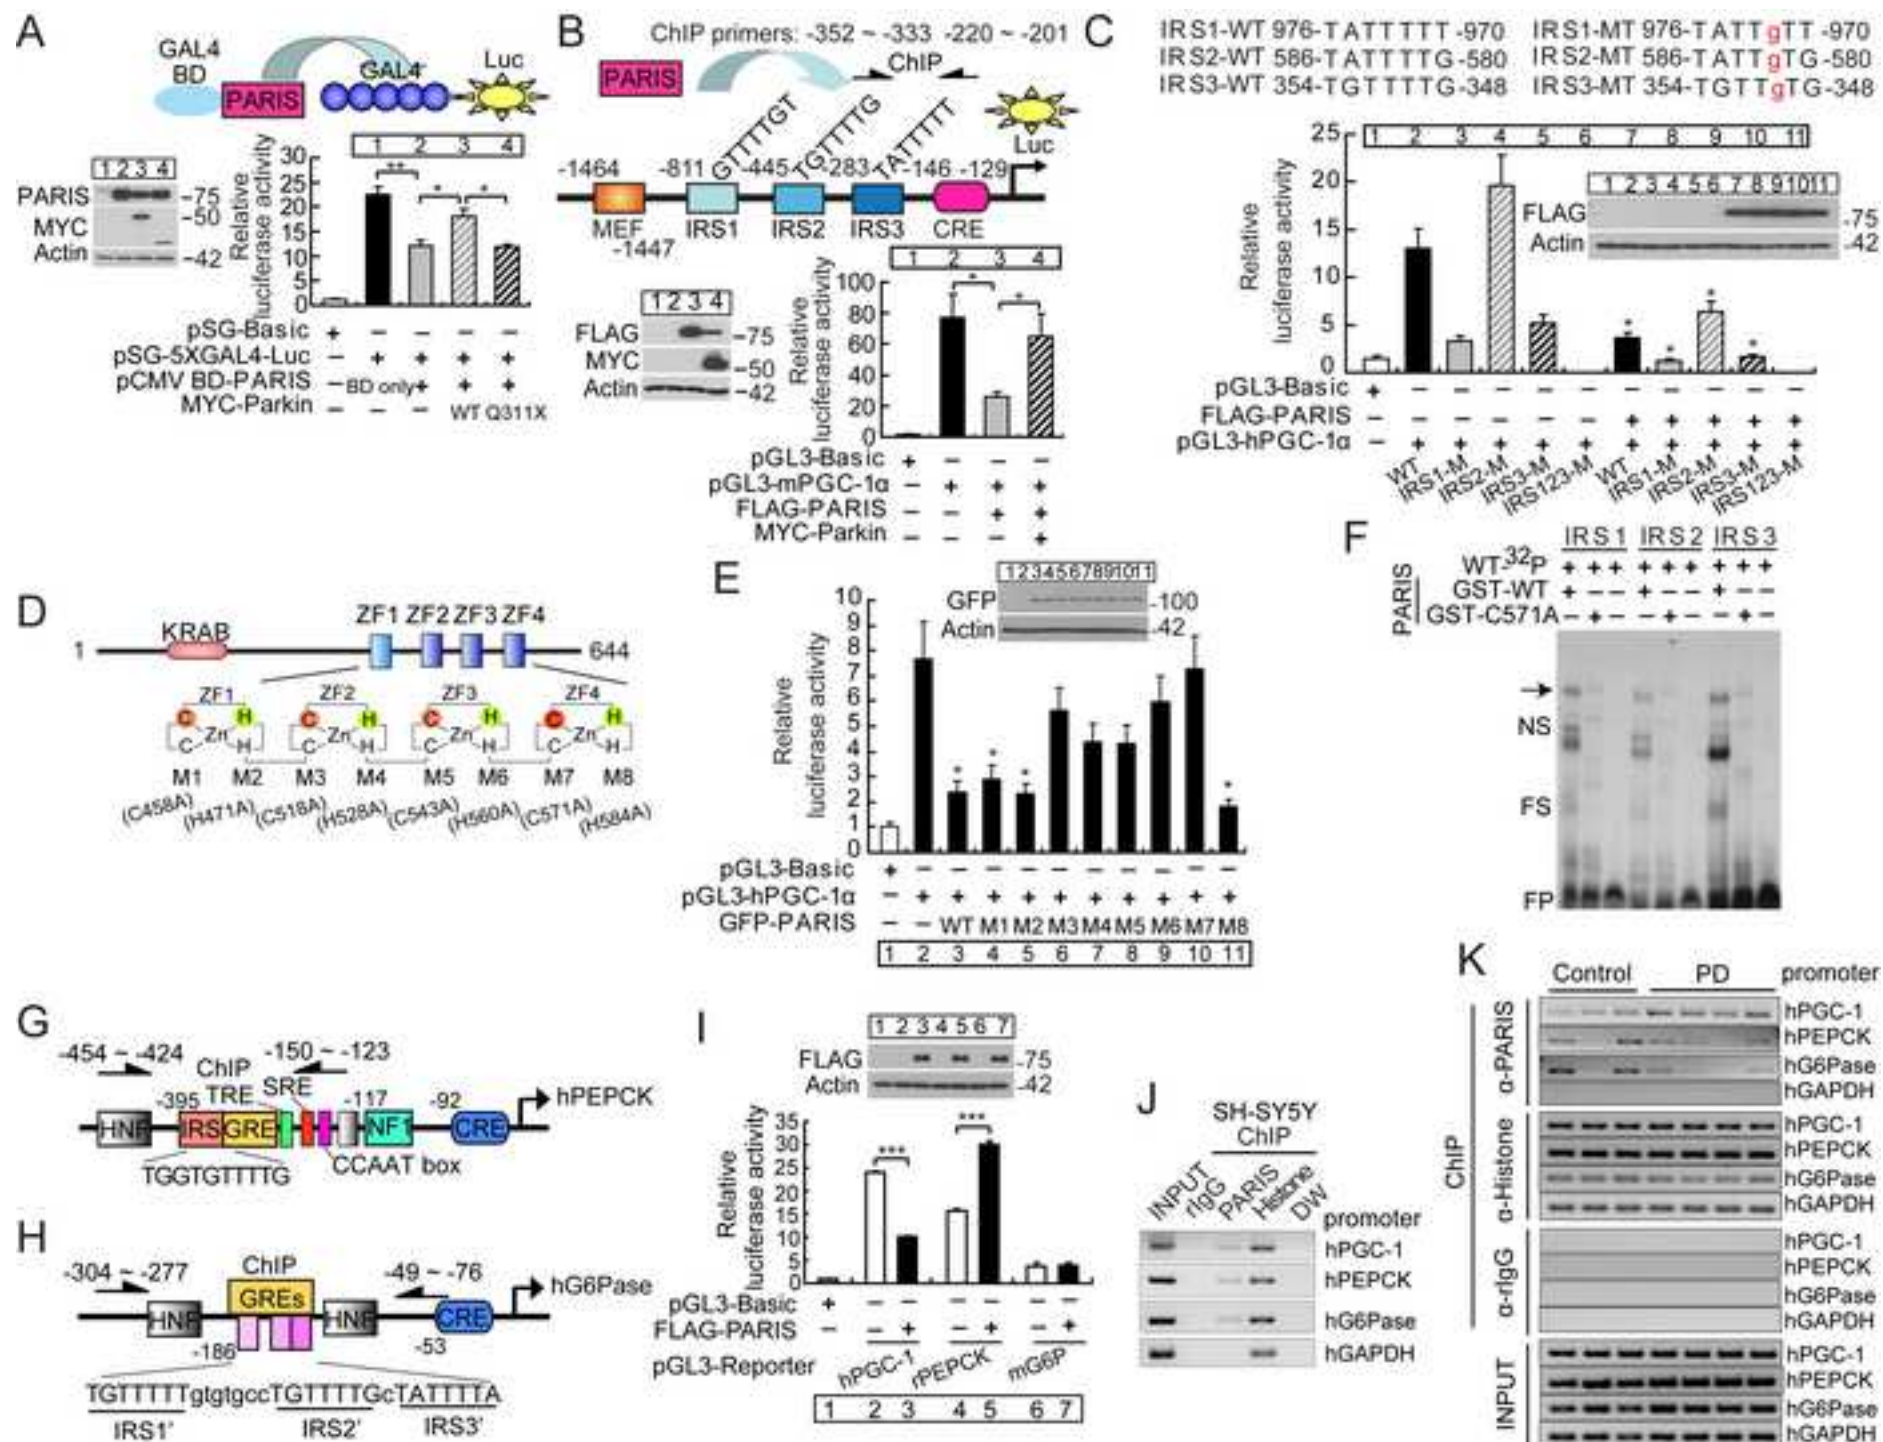

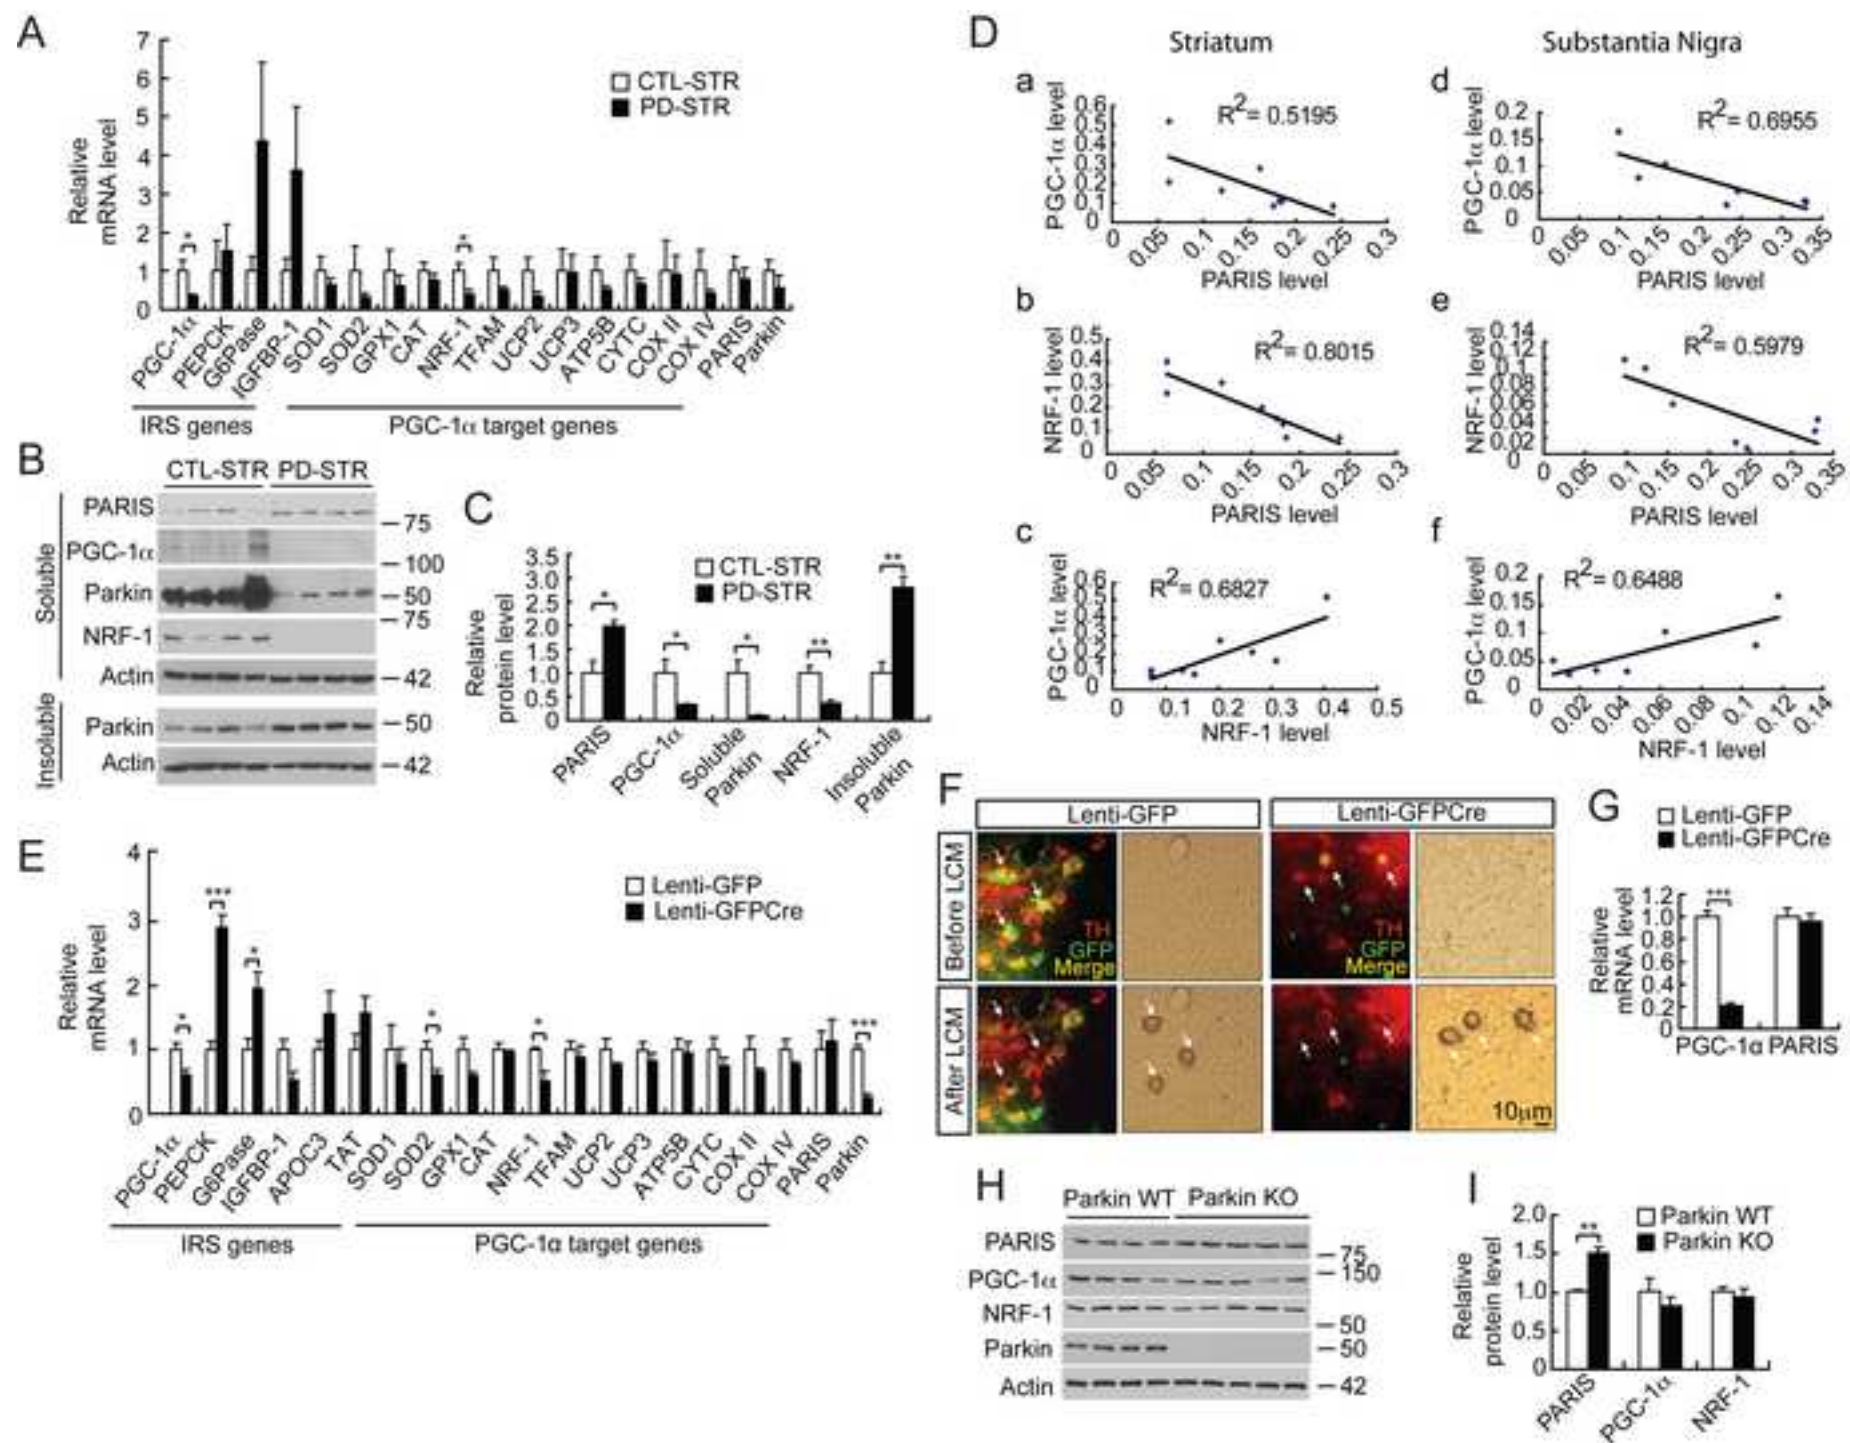

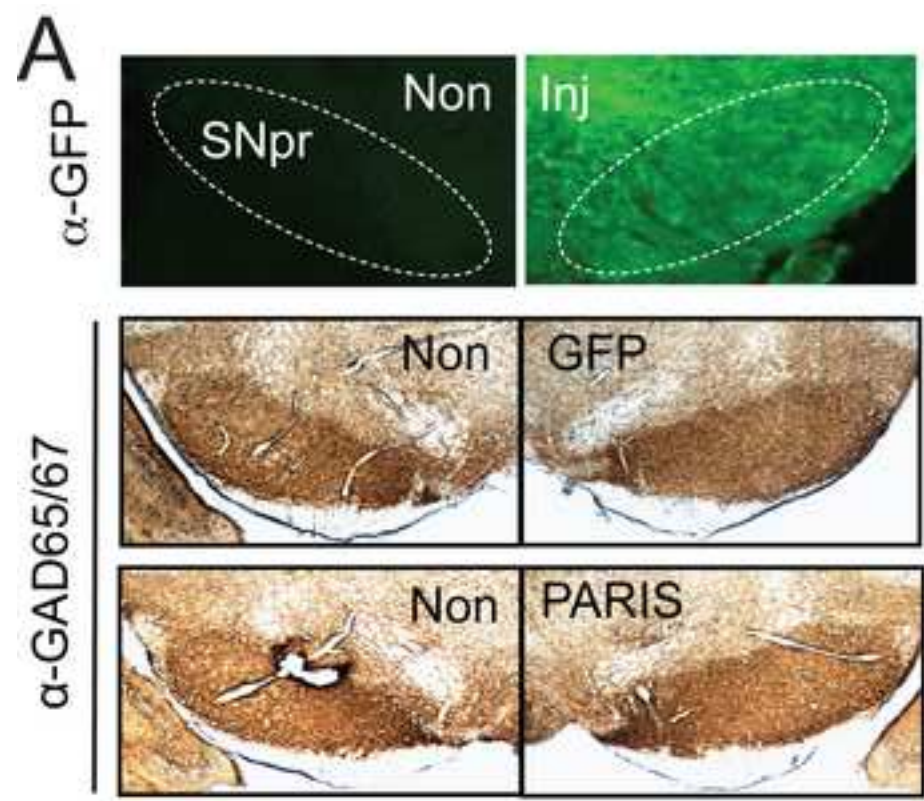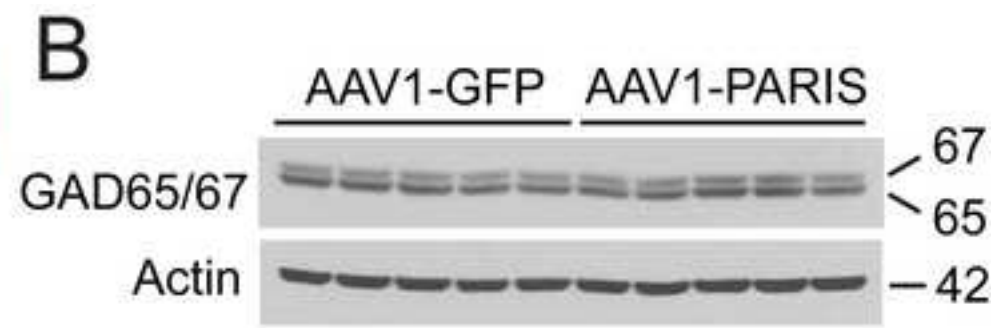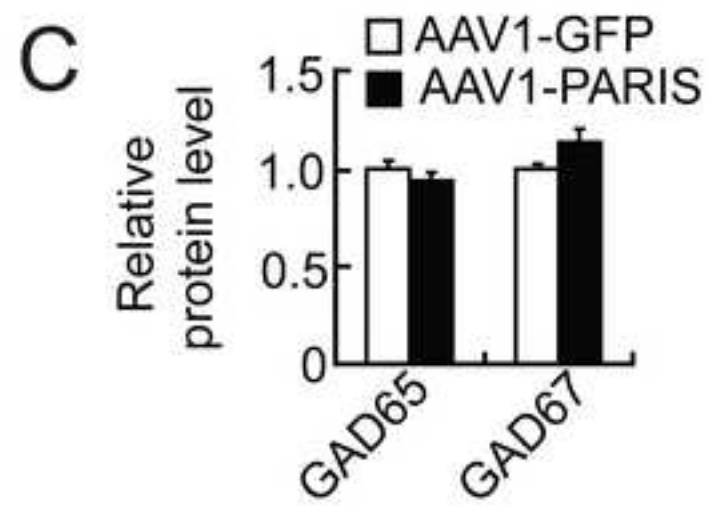

Supplement: NIHMS272251-supplement-02.pdf [file NIHMS272251-supplement-02.pdf]
